# Supplementary material for: Discovery of a novel type of autophagy targeting RNA
Source: PubMed Central journal article supplement — Autophagy. 2013 Mar 1;9(3):403–9. doi: 10.4161/auto.23002 (PMC3590259; doi:10.4161/auto.23002), 2013-03-01
Supplement: auto-9-403-s01.pdf [file auto-9-403-s01.pdf]

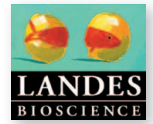

## **Supplemental Material to:**

**Yuuki Fujiwara, Akiko Furuta, Hisae Kikuchi, Shu Aizawa,  
Yusuke Hatanaka, Chiho Konya, Kenko Uchida,  
Aya Yoshimura, Yoshitaka Tamai, Keiji Wada  
and Tomohiro Kabuta**

**Discovery of a novel type of autophagy targeting RNA**

**Autophagy 2012; 9(3)**

**<http://dx.doi.org/10.4161/auto.23002>**

**[www.landesbioscience.com/journals/autophagy/article/23002](http://www.landesbioscience.com/journals/autophagy/article/23002)**

## Supplementary Information

### Materials and Methods

#### Calculation of the identity levels of amino acid sequences

The identity levels of the cytosolic sequences of fly and nematode LAMPs to those of human LAMP2s were calculated using Clustal W2 (<http://www.ebi.ac.uk/Tools/msa/clustalw2/>).

#### Antibodies and peptides

The following primary antibodies were used: rat monoclonal anti-HA (3F10, Roche, 11867423001), mouse monoclonal anti-HNRNPA1 (F-8, Santa Cruz, sc-365486), rabbit polyclonal anti-RPL8 (Lifespan, LS-C31782), monoclonal rabbit anti-RPS6 (Cell Signaling, 2217), rabbit polyclonal anti-SNCA/ $\alpha$ -synuclein (Chemicon, AB5038), mouse monoclonal anti-GAPDH (6C5, Chemicon, MAB374), and mouse monoclonal anti-ACTB/ $\beta$ -actin (AC15, Sigma, A5441). The doublet observed on the immunoblot with anti-HNRNPA1 antibody corresponds to HNRNPA1.<sup>1</sup>

The rabbit polyclonal anti-LAMP2C antibody was raised in rabbit against synthetic peptides (CGRRKSRTGYQSV and CSYMIGRRKSRTGYQSV) containing an amino acid sequence corresponding to the cytosolic region of LAMP2C. The specificity of the anti-LAMP2C antibody was confirmed as shown in **Fig. S2**.

Biotin-conjugated peptides were synthesized by Invitrogen as a custom service. The sequences of the peptides containing the cytosolic sequence of *C. elegans* LMP-1 or *Drosophila* LAMP-1 are as follows. *C. elegans*: [Biotin]-GSRARAKRQGYASV; *Drosophila*:

[Biotin]-GSRRRSTSRGYMSF.

### Construction of plasmids

pCI-neo-LAMP2A plasmid was prepared as described previously.<sup>2</sup> Human *RPL8* cDNA was purchased from Kazusa DNA Research Institute (FHC08670), and human *HNRNPA1* and *LAMP2B* cDNAs were purchased from Open Biosystems. *Lamp2c* cDNA was generated from total RNA from mouse brain. For construction of pCI-neo-*LAMP2B* and pCI-neo-*Lamp2c* vectors, each cDNA was amplified by PCR, and the PCR products were subcloned into pCI-neo mammalian expression vector (Promega, E1841) using XhoI and NotI sites. pCI-neo-*HNRNPA1*-HA for expressing HNRNPA1 with an HA tag at the C-terminus was also constructed in PCI-neo. The primers used were as follows. For *LAMP2B*: 5'-AAA ACT CGA GCC GCC ACC ATG GTG TGC TTC CGC CTC TTC C-3' and 5'-AAA AGC GGC CGC TTA CAG AGT CTG ATA TCC AGC ATA AT-3'. For *Lamp2c*: 5'-AAA ACT CGA GCC GCC ACC ATG TGC CTC TCT CCG GTT AAA GGC-3' and 5'-AAA AGC GGC CGC TTA GAC AGA CTG ATA ACC AGT ACG AC-3'. For *HNRNPA1*: 5'-AAA ACT CGA GCC GCC ACC ATG TCT AAG TCA GAG TCT CCT AAA G-3' and 5'-AAA AGC GGC CGC TTA AGC GTA ATC TGG AAC ATC GTA TGG GTA AAA TCT TCT GCC ACT GCC ATA GC-3'. For construction of a pGEX-*RPL8* plasmid, cDNA was amplified by PCR, and the PCR products were subcloned into pGEX6P-1 (GE Healthcare, 28-9546-48) using EcoRI and XhoI sites. The following primers were used in this experiment. 5'-AAA AGA ATT CAT GGG CCG TGT GAT C-3' and 5'-AAA ACT CGA GCT AGT TCT CTT TCT C-3'.

For amino acid substitutions, mutations were introduced using the Quik-Change Mutagenesis Kit according to the manufacturer's instructions (Stratagene, 200518). All resulting

constructs were confirmed by sequencing.

### **Cell culture and transfection**

HeLa, Neuro-2a and J774A.1 cells were maintained in Dulbecco's modified Eagle's medium (Invitrogen, 12701-017) supplemented with 10% fetal bovine serum (Cell Culture Bioscience, 171012). Transient transfection with each vector was performed using Lipofectamine LTX with Plus Reagent (Invitrogen, 15338-100), according to the manufacturer's instructions.

### **Preparation of recombinant RPL8 protein**

Recombinant RPL8 protein was prepared as previously described.<sup>3</sup> *Escherichia coli* BL21 was transformed with GEX6p-1-*RPL8*. Production of the protein was induced by addition of isopropyl- $\beta$ -D-thiogalactopyranoside to a final concentration of 1 mM. The cells were then incubated in 37°C. After 2 h of induction, the cells were harvested and lysed by sonication in PBS containing 1% Triton X-100 and protease inhibitors. GST-tagged RPL8 was purified using glutathione Sepharose 4B (GE Healthcare, 17-0756-01), and RPL8 was released from GST by digestion using PreScission Protease (GE Healthcare, 27-0843-01).

### **LAMP2-deficient mice**

LAMP2-deficient mice, which lack expression of all isoforms of LAMP2,<sup>4</sup> were backcrossed to C57BL/6J mice for more than 11 generations. These mice were propagated at the National Institute of Neuroscience, National Center of Neurology and Psychiatry. All animal experiments were performed in strict accordance with the guidelines of the National Institute of

Neuroscience, National Center of Neurology and Psychiatry, and were approved by the Animal Investigation Committee of the Institute.

### **Cell and brain lysis**

HeLa cells were harvested and lysed on ice in 1% Triton X-100 lysis buffer containing 50 mM Tris-HCl, pH 7.5, 150 mM NaCl, 5 mM EDTA, 1% Triton X-100, and protease inhibitors (Complete, EDTA free; Roche Applied Science, 1873580). For the experiments shown in **Fig. 4E**, 40 to 48-week-old mouse brains were used. Each mouse brain was homogenized in 10 ml of the lysis buffer. Lysates were centrifuged at  $17,700 \times g$  for 10 min at 4°C, and the supernatants were pooled.

### **Pull-down assay**

Pull-down assays were performed as previously described.<sup>2</sup> For assays using lysates of HeLa cells or brains, cell lysate or 10- to 12-week-old mouse brain lysate containing 3 mg of proteins were prepared, and incubated with 8 nmol of biotin fusion peptides and 40  $\mu$ l of Streptavidin–Sepharose (GE Healthcare, 17-5113-01). After 2 h of incubation at 4°C, beads were washed three times with lysis buffer. Pulled-down proteins were eluted with SDS-PAGE sample buffer (10 mM Tris, pH 7.8, 3% SDS, 5% glycerol, 0.02% bromophenol blue and 2% 2-mercaptoethanol), and analyzed by SDS-PAGE followed by silver staining, Coomassie brilliant blue (CBB) staining or immunoblotting. RNA pulled down with the beads was extracted using phenol-chloroform, and analyzed by electrophoresis in agarose gels containing ethidium bromide.

For assays using purified RNA, Streptavidin–Sepharose beads were blocked with 3%

bovine serum albumin for 15 h. Ten micrograms of purified total RNA was incubated with 8 nmol of biotin fusion peptides and 40  $\mu$ l of the beads in PBS containing 0.05% Triton X-100. After 2 h of incubation at 4°C, beads were washed three times with PBS containing 0.05% Triton X-100. RNA pulled down with the beads was extracted using phenol-chloroform or TRIzol (Life Technologies, 15596-018), and analyzed by electrophoresis in agarose gels containing ethidium bromide.

In some experiments, lysates were preincubated with RNase A (200  $\mu$ g/ml in final concentration) for 1 h before the peptides, beads and lysates were mixed.

### **Immunoblotting**

SDS-PAGE was performed under reducing conditions. Immunoblotting was performed according to standard procedures. After overnight incubation with primary antibodies at 4°C, each blot was probed with horseradish peroxidase-conjugated secondary antibodies. Immunoreactive signals were visualized with SuperSignal West Dura extended duration substrate (Pierce, 34076) or SuperSignal West Femto extended duration substrate (Pierce, 34095) and detected using a chemiluminescence imaging system (FluorChem; Alpha Innotech). The signal intensity was quantified by densitometry using FluorChem software (Alpha Innotech).

### **Primary culture of neurons and glial cells**

Primary culture of neurons and glial cells was performed according to standard procedures. For neurons, cerebral cortices were dissected from pups of a C57BL/6J mouse at embryonic day 14. Cortices were mechanically dissociated by trituration and trypsinized at 37°C

in 0.25 % trypsin- 1 mM EDTA. One microliter of trypsin inhibitor (3.5 BAEE units/ $\mu$ l, GIBCO, 17075029) and 1 ml of 1 mg/ml DNase I were added after 5 min, and centrifuged for 3 min at 4°C ( $190 \times g$ ). The supernatant was removed, and the cells were plated on culture dishes coated with 10  $\mu$ g/ml poly-D-lysine. Cells were incubated at 37°C with 5% CO<sub>2</sub> in Neurobasal Medium (GIBCO, 21103-049500) supplemented with 0.5 mM L-glutamin, 2% B27 supplement (GIBCO, 0050129SA), and 100 units/ml penicillin-streptomycin.

For glial cells, cerebral cortices were dissected from the pups of a C57BL/6J mouse at postnatal day 1 to 2. Cortices were mechanically dissociated by trituration and trypsinized at 37 °C in 0.25% trypsin-1 mM EDTA. Afer 5 min, 10% ES Cell Qualified Fetal Bovine Serum (FBS; GIBCO, 16141) and 1 ml of 1 mg/ml DNase I were added; then, cells were filtered using a 70- $\mu$ m cell strainer (Falcon, 352350) and centrifuged for 3 min at 4°C ( $427 \times g$ ). The supernatant was removed, and the cells were plated on 10-cm dishes at a density of  $5 \times 10^6$  cells/dish with Dulbecco's modified Eagle's medium containing 10% FBS. Cells were incubated at 37°C with 5% CO<sub>2</sub> for 7 days and then detached in 0.25% trypsin-1 mM EDTA and reseeded in 150-cm<sup>2</sup> bottles (Techno Plastic Products, 90151) at a density of  $1 \times 10^7$  cells/bottle. After a further 7 days, these mixed glial cultures were shaken at 80 rpm for 5 min at 37°C to eliminate non-astrocytic cells (referred to as "mixed non-astrocytic cultures"). The 150-cm<sup>2</sup> bottles were shaken again at 250 rpm for 16 h at 37°C to eliminate any remaining oligodendrocytes. Astrocytes adherent to the bottles were trypsinized and reseeded in culture dishes with DMEM containing 10% FBS. After 48 h, the medium was changed to DMEM supplemented with 2 mM L-glutamine, 100 units/ml penicillin-streptomycin, and 1% N2 supplement (GIBCO, 17502-048). The mixed non-astrocytic cultures eliminated from the 150-cm<sup>2</sup> bottles were plated on culture dishes with medium for 30

min at 37°C to attach microglia to the dishes. The medium was retrieved and oligodendrocytes were plated on culture dishes coated with 10 µg/ml poly-D-lysine.

### **Purification of total RNA from mice brains**

Total RNA was purified from 10 to 12-week-old mouse brains using an RNeasy Lipid Tissue Mini Kit (QIAGEN, 74804) according to the manufacturer's instructions.

### **Quantitative real-time PCR analysis**

Real-time PCR was carried out as previously described.<sup>5</sup> Total RNA was prepared from 10 to 12-week-old mouse tissues or cultured cells, and cDNA was synthesized using a Quantitect Reverse Transcription Kit (QIAGEN, 205313). Relative levels of mRNA expression were measured by real-time PCR using SYBR Green PCR Master Mix (Applied Biosystems, 4344463) and Mx3000P (Stratagene). Primers specific for mouse *Lamp2c* (forward: 5'-AAA GAG CAG GTG CTT TCT GTG-3'; reverse; 5'-ACA CCC ACT GCA ACA GGA AT-3') were used. *Actb/β-actin* was amplified with each sample for normalization. Primers used in a quantification of *Actb* levels were as follows. Forward: 5'-CGT GCG TGA CAT CAA AGA GAA-3'; reverse: 5'-CAA TAG TGA TGA CCT GGC CGT-3'.

### **Mass spectrometry analysis**

Protein bands in the molecular weight range 30 to 50 kDa, which interacted with LAMP2C peptide in a pull-down assay using HeLa cells, were analyzed by LC-MS/MS at Shimadzu Techno-Research, Inc. as a custom service. The identified proteins are shown in **Table**



## **S1.**

All protein samples detected in a pull-down assay using brain lysate were analyzed by LC-MS/MS at Oncomics Co., Ltd as a custom service. The identified proteins in control samples were subtracted from the identified proteins in the sample pulled down with LAMP2C peptide. Identified proteins with a Mascot score over 150 are shown in **Table S1**.

### **Uptake and degradation of RNA and proteins by isolated lysosomes**

Isolation of lysosomes and monitoring of CMA were performed as described.<sup>6</sup> Briefly, lysosomes were isolated from 10 to 12-week-old mouse brains using a Lysosome Enrichment Kit (Pierce, 89839). Lysosomes were preincubated on ice in 0.3 M sucrose with or without 10 mM chymostatin for 10 min, and then incubated with 5  $\mu$ g of purified SNCA/ $\alpha$ -synuclein (ATGen, SNA2001), ovalbumin (Albumin from chicken egg white, Sigma, A7641) or RPL8 for 20 min at 37°C in 30  $\mu$ l of 0.3 M sucrose containing 10 mM MOPS buffer (pH 8.0), energy regenerating system (10 mM ATP, 10 mM MgCl<sub>2</sub>, 2 mM phosphocreatine, and 50  $\mu$ g/ml creatine phosphokinase) and 1  $\mu$ g of active HSPA8 (Stress Marq, SPR-106). After the incubation, lysosomes were precipitated, and proteins remaining with lysosomes were detected by immunoblotting. The uptakes of the proteins were detected as difference of protein levels between chymostatin-treated and untreated samples.<sup>7,8</sup>

For monitoring RNA uptake, isolated lysosomes (25 to 50  $\mu$ g of protein) were incubated with 5 or 10  $\mu$ g of purified total RNA at 37°C for 5 or 20 min in 30  $\mu$ l of 0.3 M sucrose containing 10 mM MOPS buffer (pH 8.0) with or without energy regenerating system (ATP- or ATP+). In some experiments, 1  $\mu$ g of active HSPA8 was added in the solution. After the

incubation, lysosomes were precipitated by centrifugation and RNA remaining in the supernatant was analyzed by electrophoresis in agarose gels containing ethidium bromide. RNA in agarose gels was detected using FluorChem, and the levels of RNA were quantified by densitometry using FluorChem software. To assess the presence of uptaken RNA inside lysosomes, RNA outside of lysosomes was degraded by 200  $\mu\text{g}$  of RNase A after the incubation. RNase A treatment was carried out for 20 min on ice; then, RNA was extracted using TRIzol. Levels of RNase A-resistant RNA were analyzed in agarose gels. In a time course analysis, isolated lysosomes were incubated with 10  $\mu\text{g}$  of total RNA for 0 to 20 min as indicated in **Fig. 3C**.

Degradation of RNA by isolated lysosomes was investigated as follows. Isolated lysosomes and 5  $\mu\text{g}$  of total RNA were incubated with or without energy regenerating system for 5 min, and the total levels of RNA in the samples were analyzed.

For assays using HeLa cells, lysosomes were isolated from  $\sim 1.4 \times 10^8$  cells transfected with pCI-neo-*Lamp2c* or empty vector, and subjected to analysis as described above.

### **Measurement of RNA turnover in HeLa cells**

RNA turnover in HeLa cells was measured as described,<sup>9</sup> with slight modifications. Briefly,  $7.0 \times 10^4$  cells/well of HeLa cells were incubated in 24-well dishes (BD Falcon, 353047) 24 h before transfection, and 0.2  $\mu\text{g}$ /well of plasmids was transfected into these cells. To prelabel RNA, 0.3 uCi/ml of [<sup>3</sup>H]uridine was added to the cells 24 h after the transfection. After 24 h of labelling, cells were washed with 500  $\mu\text{l}$  of medium containing 5 mM non-labelled uridine, and then incubated in another 500  $\mu\text{l}$  of the same medium (time zero). After 6 h of incubation, media were collected and floating cells were removed by centrifugation ( $900 \times g$ ). Then, acid-soluble

radioactivity in medium was measured using Tri-Carb 3100TR (Packard).

At time zero, the cells were trypsinized and acid-insoluble radioactivity was measured to access levels of labelled RNA in cells. We confirmed that, at time zero, overexpression of each LAMP2 had no significant effect on levels of labelled RNA (**Fig. S8**).

### **Quantitation of total RNA in mice brains**

Total RNA was extracted from 40 to 48-week-old mouse brains using TRIzol Reagent according to the standard procedure. The levels of RNA were then quantified by measuring OD<sub>260</sub> values, normalized by brain weight, and these were compared between WT and KO littermates.

### **Electron microscopy**

Isolated lysosomes were fixed in 0.1% glutaraldehyde and 4% paraformaldehyde in PBS for 16 h at 4°C, and post-fixed with 1% osmium for 1 h at room temperature. Samples were then dehydrated in a series of water/ethanol mixtures to 100% ethanol, and embedded in Epon (TAAB, 3402). The embedded samples were sectioned at 60 nm, collected on 400-mesh copper grids, and viewed on a Tecnai Spirit transmission electron microscope (FEI, Hillsboro, OR) at 120 kV.

For immunogold electron microscopy, isolated lysosomes were incubated with or without purified total RNA in the presence of ATP (energy regenerating system) for 5 min, precipitated by centrifugation, and fixed in 0.1% glutaraldehyde and 4% paraformaldehyde in PBS for 16 h at 4°C. Samples were then dehydrated in a series of water/ethanol mixtures to 100% ethanol, and embedded in LR White (Nisshin EM Co., Ltd., 3962). The embedded samples were

sectioned at 100 nm, and collected on 400-mesh nickel grids. Immunogold labelling was performed using an anti-rRNA antibody (1:50, Y10b, Abcam, ab37144) followed by anti-mouse IgG coupled with 10 nm of gold particles, and viewed using a Tecnai Spirit transmission electron microscope (FEI) at 80 kV. The Y10b antibody (anti-rRNA antibody) specifically recognizes several different rRNAs from diverse species, including 28S, 18S and 5.8S rRNAs.<sup>10</sup>

### **Statistical analyses**

For comparisons between two groups, the statistical significance of differences was determined by Student's t test. For comparisons of more than two groups, Dunnett's multiple comparison test was used. \* and \*\* indicate  $P < 0.05$  and  $P < 0.01$ , respectively.

### **Supplementary References**

1. Raffalli-Mathieu F, Glisovic T, Ben-David Y, Lang MA. Heterogeneous nuclear ribonucleoprotein A1 and regulation of the xenobiotic-inducible gene Cyp2a5. *Mol Pharmacol* 2002; 61:795-9.
2. Kabuta T, Furuta A, Aoki S, Furuta K, Wada K. Aberrant interaction between Parkinson disease-associated mutant UCH-L1 and the lysosomal receptor for chaperone-mediated autophagy. *J Biol Chem* 2008; 283:23731-8.
3. Kabuta T, Setsuie R, Mitsui T, Kinugawa A, Sakurai M, Aoki S, et al. Aberrant molecular properties shared by familial Parkinson's disease-associated mutant UCH-L1 and carbonyl-modified UCH-L1. *Hum Mol Genet* 2008; 17:1482-96.
4. Tanaka Y, Guhde G, Suter A, Eskelinen EL, Hartmann D, Lullmann-Rauch R, et al.

Accumulation of autophagic vacuoles and cardiomyopathy in LAMP-2-deficient mice. *Nature* 2000; 406:902-6.

5. Kodomari I, Wada E, Nakamura S, Wada K. Maternal supply of BDNF to mouse fetal brain through the placenta. *Neurochem Int* 2009; 54:95-8.

6. Ali AB, Nin DS, Tam J, Khan M. Role of chaperone mediated autophagy (CMA) in the degradation of misfolded N-CoR protein in non-small cell lung cancer (NSCLC) cells. *PLoS One* 2011; 6:e25268.

7. Aniento F, Roche E, Cuervo AM, Knecht E. Uptake and degradation of glyceraldehyde-3-phosphate dehydrogenase by rat liver lysosomes. *J Biol Chem* 1993; 268:10463-70.

8. Kaushik S, Cuervo AM. Methods to monitor chaperone-mediated autophagy. *Methods Enzymol* 2009; 452:297-324.

9. Sameshima M, Liebhaber SA, Schlessinger D. Dual pathways for ribonucleic acid turnover in WI-38 but not in I-cell human diploid fibroblasts. *Mol Cell Biol* 1981; 1:75-81.

10. Garden GA, Hartlage-Rubsamen M, Rubel EW, Bothwell MA. Protein masking of a ribosomal RNA epitope is an early event in afferent deprivation-induced neuronal death. *Mol Cell Neurosci* 1995; 6:293-310.

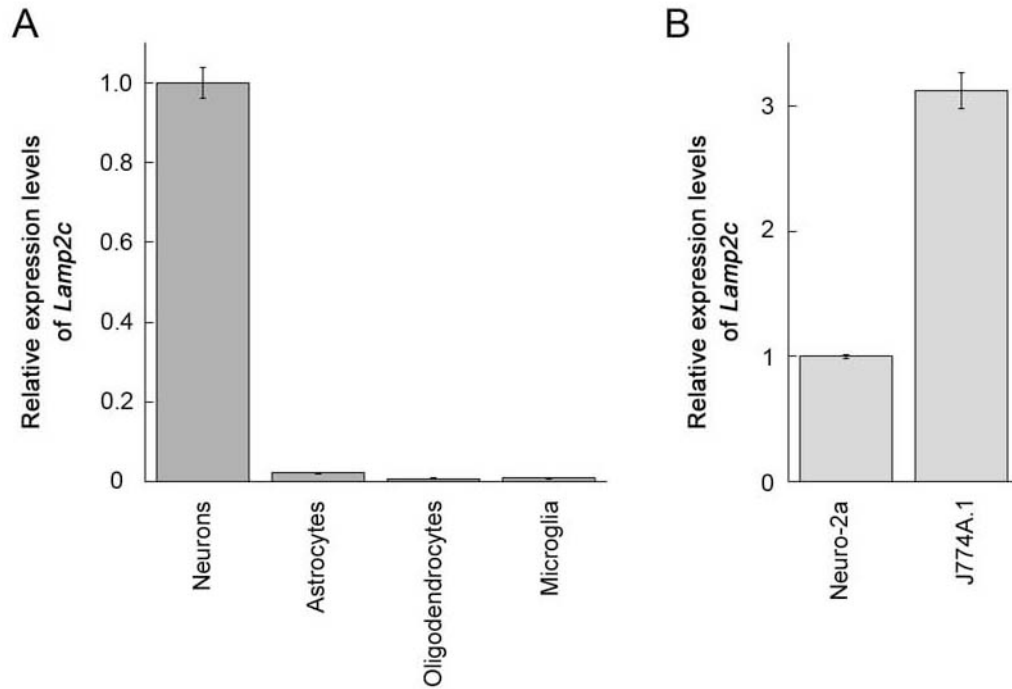

**Figure S1. Expression levels of *Lamp2c* mRNA in various types of cells.**

(A and B) Total RNA was prepared from primary cultured neurons, astrocytes, oligodendrocytes and microglia (A), or from Neuro-2a cells (neuronal cell line) and J774A.1 cells (macrophage cell line) (B). Relative levels of *Lamp2c* mRNA were measured by quantitative real-time PCR (n=2-3).

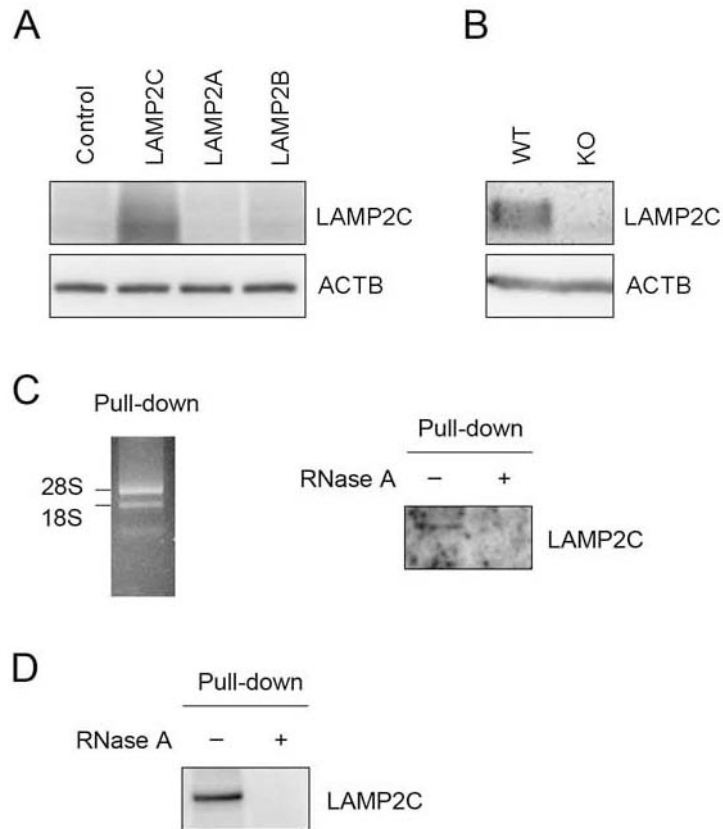

**Figure S2. Interaction between endogenous LAMP2C and RNA**

(A and B) Specificity of the anti-LAMP2C antibody. HeLa cells were transfected with the indicated constructs (control: empty vector). Cell lysates were prepared and immunoblotted using anti-LAMP2C and ACTB/ $\beta$ -actin antibodies (A). Brain lysates were prepared from WT and LAMP2 KO mice (6 weeks of age), and immunoblotted (B). (C) Brain lysate containing 4 mg/ml protein was prepared from a 12-week-old mouse. After 1 ml of lysate was incubated with or without RNase A (final concentration: 0.2 mg/ml), total RNA was pulled down using biotin-labelled random DNA nonamers (5 nmol/sample). RNA could be pulled-down by random DNA nonamers (left panel). Endogenous LAMP2C in the pulled-down samples was detected by

immunoblotting using an anti-LAMP2C antibody. (D) Brain lysate containing 4 mg/ml protein was prepared from a 12-week-old mouse. After 1 ml of lysate was incubated with or without RNase A (final concentration: 0.2 mg/ml), total RNA was pulled down using the same method as described in the legend for Fig. 2C with biotin-labelled peptide containing the cytosolic sequence of LAMP2C (8 nmol/sample), which is indicated in Fig. 1B. Endogenous LAMP2C in the pulled-down samples was detected by immunoblotting using an anti-LAMP2C antibody. In both (C) and (D), LAMP2C was detected in the pulled-down samples only in the absence of RNase A, indicating that endogenous LAMP2C interacts with RNA.



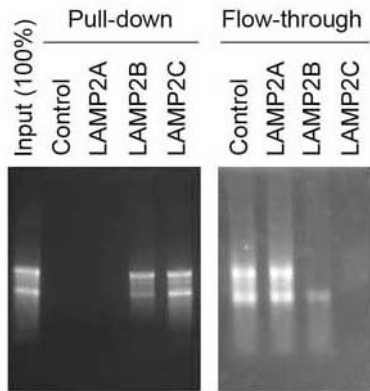

**Figure S3. Interactions of purified total RNA with cytosolic sequence of LAMP2A, LAMP2B and LAMP2C.**

A pull-down assay was performed using purified total RNA as described in Materials and Methods.

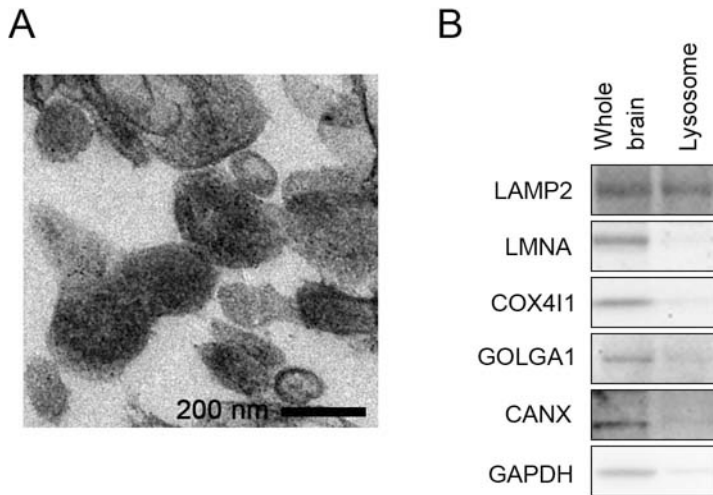

**Figure S4. Ultrastructural and biochemical characterization of isolated lysosomes**

(A) Ultrastructural analysis of isolated lysosomes. (B) Immunoblot of lysates prepared from whole brain or isolated lysosomes using different organelle markers: LAMP2 (lysosomal marker), LMNA/lamin A (nuclei), COX411/COX IV (mitochondrial marker), GOLGA1/Golgin-97 (Golgi apparatus marker), CANX/calnexin (endoplasmic reticulum marker), and GAPDH (cytosolic marker).

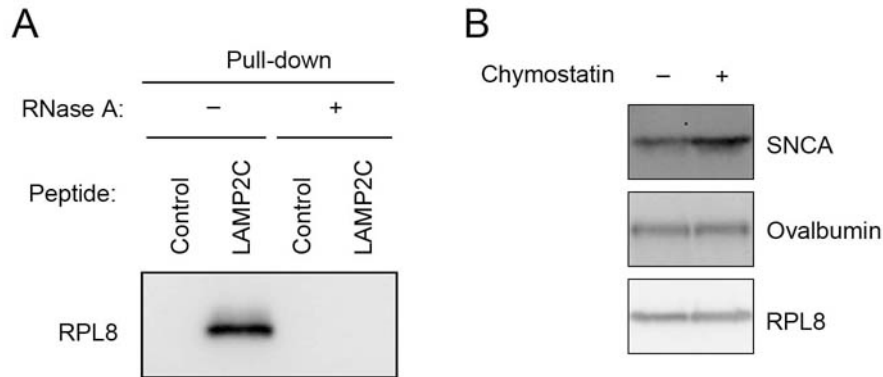

**Figure S5. Uptake of proteins by isolated lysosomes.**

(A) Purified RPL8 was mixed with a biotin-labelled peptide matching the cytosolic tail of LAMP2C, and a pull-down assay was performed in the presence or absence of RNase A. RPL8 interacted with the peptide in the absence of RNase A, but not in the presence of RNase A, indicating that purified RPL8 contained RNA and interacted with the LAMP2C peptide through RNA. (B) Freshly isolated lysosomes were prepared from mouse brain, and a lysosomal uptake assay was performed using purified SNCA/ $\alpha$ -synuclein, ovalbumin and RPL8. The lysosomal uptake of SNCA, but not of ovalbumin and RPL8, was detected, even though purified RPL8 interacts with LAMP2C peptide.

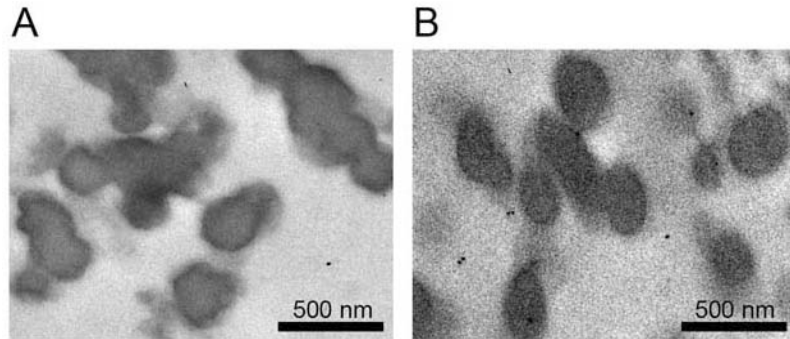

**Figure S6. Control assays for immunogold electron microscopy.**

(A) Isolated lysosomes were incubated with ATP in the presence of RNA, and then immunogold labelling was performed without primary antibody. No gold particles were observed in the lysosomes. (B) Isolated lysosomes were incubated with ATP in the absence of RNA, and then immunostained with an anti-rRNA primary antibody, followed by immunogold labelling. Virtually no gold particles were observed in the lysosomes.

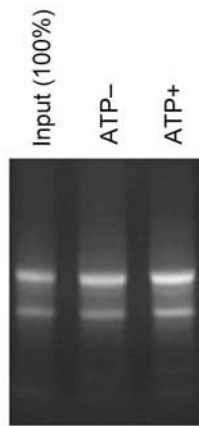

**Figure S7. RNA was not degraded in the solution outside lysosomes incubated either with or without ATP.**

Isolated lysosomes were incubated with or without ATP for 5 min at 37°C. The lysosomes were removed by centrifugation, and then the solution outside the lysosomes was incubated with 10 µg of RNA for 5 min at 37°C. RNA was analyzed by electrophoresis in agarose gels containing ethidium bromide.

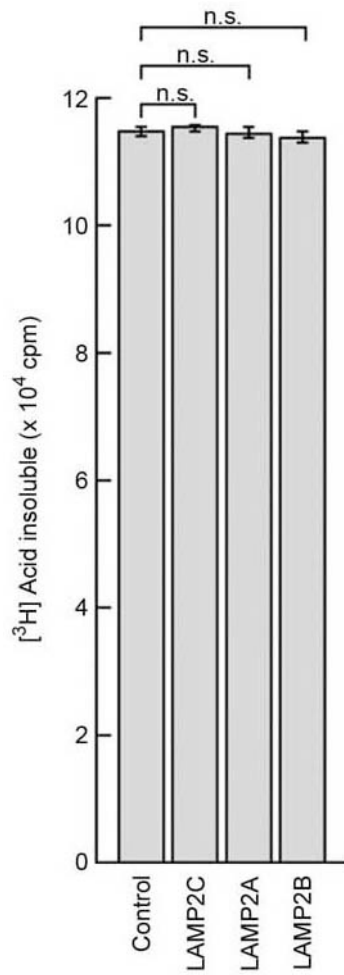

**Figure S8. Acid-insoluble radioactivity in HeLa cells.**

HeLa cells transfected with each LAMP2 isoform or empty vector. Cells were labelled with [<sup>3</sup>H]uridine for 24 h, and then acid-insoluble radioactivity in cells was measured (n=3).

**Table S1. LC-MS/MS analysis of proteins that interacted with the cytosolic sequence of LAMP2C.**

GenInfo Identifier (GI) and protein names are shown.

**HeLa cells**

| Accession number | Protein name                                    |
|------------------|-------------------------------------------------|
| gi 4506661       | RPL7A, ribosomal protein L7a                    |
| gi 4506667       | RPLP0, 60S acidic ribosomal protein P0          |
| gi 14591909      | RPL5, ribosomal protein L5                      |
| gi 12653649      | RPL14, ribosomal protein L14                    |
|                  | HNRNPA1, heterogenous nuclear ribonucleoprotein |
| gi 36102         | A1                                              |
| gi 356168        | HIST1H1B, histone H1b                           |
| gi 337930        | RPS4X, ribosomal protein S4e                    |
| gi 35903         | RPL7, ribosomal protein L7                      |
| gi 4506743       | RPS8, ribosomal protein S8                      |
| gi 825671        | NPM1, B23 nucleophosmin (280 AA)                |
| gi 4885381       | HIST1H1B, histone H1.5                          |
| gi 337580        | RPL3, ribosomal protein L3                      |
| gi 337457        | LARP1, ribonucleoprotein La                     |
| gi 306553        | RPS3A, ribosomal protein S3A                    |

|             |                                                  |
|-------------|--------------------------------------------------|
| gi 16579885 | RPL4, ribosomal protein L4                       |
| gi 4506663  | RPL8, ribosomal protein L8                       |
| gi 337514   | RPS6, ribosomal protein S6                       |
| gi 3088335  | RPS2, ribosomal protein S2                       |
| gi 306875   | HNRNPC, heterogenous nuclear ribonucleoprotein C |
| gi 531171   | RPL10A, ribosomal protein L10a                   |

### Mouse brain

| Accession number | Protein name                                                                | Group       |
|------------------|-----------------------------------------------------------------------------|-------------|
| gi 56205529      | CLTC, clathrin, heavy polypeptide (Hc)                                      | Other       |
| gi 74177681      | NCL, unnamed protein product (nucleolin)                                    | RNA-binding |
| gi 695638        | RPL6, M-TAXREB107                                                           | Ribosomal   |
| gi 6679573       | PURA, transcriptional activator protein Pur-alpha                           | DNA-binding |
| gi 6671569       | RPLP0, 60S acidic ribosomal protein P0                                      | Ribosomal   |
| gi 200770        | RPL7, ribosomal protein                                                     | Ribosomal   |
| gi 74219852      | HNRNPU, unnamed protein product (heterogeneous nuclear ribonucleoprotein U) | RNA-binding |
| gi 30794450      | RPL4, 60S ribosomal protein L4                                              | Ribosomal   |
| gi 6755252       | PURB, transcriptional activator protein Pur-beta                            | DNA-binding |
| gi 7305443       | RPL7A, 60S ribosomal protein L7a                                            | Ribosomal   |
| gi 74185347      | RPL3, unnamed protein product (ribosomal protein L3)                        | Ribosomal   |
| gi 149265827     | RPS3A, PREDICTED: 40S ribosomal protein S3a-like                            | Ribosomal   |
| gi 12846287      | RPL15, unnamed protein product (ribosomal protein                           | Ribosomal   |



|              |                                                                                               |             |
|--------------|-----------------------------------------------------------------------------------------------|-------------|
|              | L15)                                                                                          |             |
| gi 18087805  | RPS2, 40S ribosomal protein S2                                                                | Ribosomal   |
| gi 53754     | PABPC1, poly(A) binding protein                                                               | RNA-binding |
| gi 4506725   | RPS4X, 40S ribosomal protein S4, X isoform X<br>isoform                                       | Ribosomal   |
| gi 4506743   | RPS8, 40S ribosomal protein S8                                                                | Ribosomal   |
| gi 6671561   | AP2A1, AP-2 complex subunit alpha-1 isoform a                                                 | Other       |
| gi 148696938 | RPL18A, mCG14783, isoform CRA_a                                                               | Ribosomal   |
| gi 31559916  | HNRNPA3, heterogeneous nuclear ribonucleoprotein<br>A3 isoform a                              | RNA-binding |
| gi 13592053  | RPL10, 60S ribosomal protein L10                                                              | Ribosomal   |
| gi 6755372   | RPS3, 40S ribosomal protein S3                                                                | Ribosomal   |
| gi 74222288  | RPS3, unnamed protein product (ribosomal protein S3)                                          | Ribosomal   |
| gi 309263268 | GM5045, PREDICTED: 60S ribosomal protein L7<br>isoform 4                                      | Ribosomal   |
| gi 13592009  | RPL10A, 60S ribosomal protein L10a                                                            | Ribosomal   |
| gi 14141193  | RPS9, 40S ribosomal protein S9                                                                | Ribosomal   |
| gi 6677809   | RPS6, 40S ribosomal protein S6                                                                | Ribosomal   |
| gi 21313640  | AP2B1, AP-2 complex subunit beta isoform b                                                    | Other       |
| gi 74226881  | RPL8, unnamed protein product (ribosomal protein L8)                                          | Ribosomal   |
| gi 74139958  | G3BP2, unnamed protein product (GTPase activating<br>protein (SH3 domain) binding protein 2 ) | RNA-binding |
| gi 31560517  | RPL27A, 60S ribosomal protein L27a                                                            | Ribosomal   |
| gi 60334810  | RPS16, Rps16 protein                                                                          | Ribosomal   |
| gi 16741485  | RPL23A, Rpl23a protein                                                                        | Ribosomal   |

|              |                                                                                             |             |
|--------------|---------------------------------------------------------------------------------------------|-------------|
| gi 4506621   | RPL26, 60S ribosomal protein L26                                                            | Ribosomal   |
| gi 31981945  | RPL13A, 60S ribosomal protein L13a                                                          | Ribosomal   |
| gi 19111156  | DHX30, putative ATP-dependent RNA helicase<br>DHX30                                         | RNA-binding |
| gi 309266869 | RPL30, PREDICTED: 60S ribosomal protein L30-like                                            | Ribosomal   |
| gi 55562721  | DDX5, Ddx5 protein                                                                          | RNA-binding |
| gi 74182280  | FXR2, unnamed protein product (fragile X mental<br>retardation, autosomal homolog 2)        | RNA-binding |
| gi 12836885  | UPF1, nonsense mRNA reducing factor 1 NORF1                                                 | RNA-binding |
| gi 12846159  | RPL14, unnamed protein product (ribosomal protein<br>L14)                                   | Ribosomal   |
| gi 56205563  | RPL26, ribosomal protein L26                                                                | Ribosomal   |
| gi 12840700  | RPL18, unnamed protein product (ribosomal protein<br>L18)                                   | Ribosomal   |
| gi 244790087 | MYEF2, myelin expression factor 2 isoform 1                                                 | RNA-binding |
| gi 22001904  | RPL17, RecName: Full=60S ribosomal protein L17                                              | Ribosomal   |
| gi 21313308  | HNRNPM, heterogeneous nuclear ribonucleoprotein M<br>isoform a                              | RNA-binding |
| gi 74219241  | SDHA, unnamed protein product (succinate<br>dehydrogenase complex, subunit A, flavoprotein) | Other       |
| gi 4506741   | RPS7, 40S ribosomal protein S7                                                              | Ribosomal   |
| gi 27502351  | FAM164A, hypothetical protein LOC67306                                                      | DNA-binding |
| gi 6678143   | SSB, lupus La protein homolog                                                               | RNA-binding |
| gi 244790095 | MYEF2, myelin expression factor 2 isoform 3                                                 | RNA-binding |
| gi 148697602 | RPS6, mCG22088                                                                              | Ribosomal   |

|              |                                                                                |             |
|--------------|--------------------------------------------------------------------------------|-------------|
| gi 12836501  | HP1BP3, unnamed protein product (heterochromatin protein 1, binding protein 3) | DNA-binding |
| gi 13435603  | HNRNPR, Hnrpr protein                                                          | RNA-binding |
| gi 148671985 | HNRNPA1, mCG15678, isoform CRA_c                                               | RNA-binding |
| gi 14149647  | RPL9, 60S ribosomal protein L9                                                 | Ribosomal   |
| gi 4506681   | RPS11, 40S ribosomal protein S11                                               | Ribosomal   |
| gi 149233872 | RPL23A, PREDICTED: 60S ribosomal protein L23a-like                             | Ribosomal   |
| gi 4504301   | HIST2H4, histone H4                                                            | DNA-binding |
| gi 149263352 | RPL21, PREDICTED: 60S ribosomal protein L21                                    | Ribosomal   |
| gi 4506701   | RPS23, 40S ribosomal protein S23                                               | Ribosomal   |
| gi 899445    | RPL13, 60S ribosomal protein                                                   | Ribosomal   |
| gi 148688875 | RPL21, mCG115628                                                               | Ribosomal   |
| gi 66912162  | HIST2H2BB, histone H2B type 2-F isoform a                                      | DNA-binding |
| gi 83699420  | RBMXL1, heterogeneous nuclear ribonucleoprotein G                              | RNA-binding |
| gi 198643    | RPL19, ribosomal protein L19                                                   | Ribosomal   |
| gi 4506703   | RPS24, 40S ribosomal protein S24 isoform c                                     | Ribosomal   |
| gi 387207    | HSPA2, heat shock protein                                                      | Other       |
| gi 82918395  | RPS13, PREDICTED: 40S ribosomal protein S13-like                               | Ribosomal   |
| gi 6981488   | RPS26, 40S ribosomal protein S26                                               | Ribosomal   |
| gi 198578    | RPS18, ribosomal protein                                                       | Ribosomal   |
| gi 817939    | HIST2H2AA2, histone H2A                                                        | DNA-binding |
| gi 148694930 | GM13509, mCG9691                                                               | Other       |
| gi 4506619   | RPL24, 60S ribosomal protein L24                                               | Ribosomal   |
| gi 148669266 | FMR1, fragile X mental retardation syndrome 1                                  | RNA-binding |

|              |                                                                                                  |             |
|--------------|--------------------------------------------------------------------------------------------------|-------------|
| gi 6576815   | homolog, isoform CRA_a<br>SYNCRIP, synaptotagmin binding, cytoplasmic RNA<br>interacting protein | RNA-binding |
| gi 13385044  | RPL35, 60S ribosomal protein L35                                                                 | Ribosomal   |
| gi 148693239 | ILF3, interleukin enhancer binding factor 3, isoform<br>CRA_c                                    | RNA-binding |
| gi 152061323 | ETL4, RecName: Full=Sickle tail protein; AltName:<br>Full=Enhancer trap locus 4                  | Other       |
| gi 226443091 | HNRNPA0, heterogeneous nuclear ribonucleoprotein<br>A0                                           | RNA-binding |
| gi 12859322  | RPL31, unnamed protein product (ribosomal protein<br>L31)                                        | Ribosomal   |
| gi 10946928  | HNRNPH1, heterogeneous nuclear ribonucleoprotein H                                               | RNA-binding |
| gi 9845253   | HNRNPH2, heterogeneous nuclear ribonucleoprotein<br>H2                                           | RNA-binding |
| gi 6679108   | NPM1, nucleophosmin                                                                              | RNA-binding |
